# Supplementary material
Source: publisher site journal article supplement (https://www.dovepress.com/get_supplementary_file.php?f=266220-2.xlsx)
Supplement: Supplementary file 1 [file get_supplementary_file.php]

## Sheet: Clinician variables
Supplementary File 2
CLINICIAN-REPORTED VARIABLES IN THE CHICO COHORT
Construct	Item content	Response options	Variable code	Skip logics and data preparation
Identification	Record ID		record_id
	Clinical examination complete	1, Uncompleted | 2, Completed | 9, Missing	clinic_complete	Calculated field, using log info
	Examination date		date_c0
Presence of leg pain or symptoms	Does the patient have pain or symptoms in one or both legs?	0, No | 1, Yes	legpain_c0
Range of Motion	Blocked or reduced mobility of columna lumbalis - Flexion	2, Blocked | 1, Reduced | 0, Normal | 9, Do not know / not tested	genmove_flex_c0
	Blocked or reduced mobility of columna lumbalis - Extension	2, Blocked | 1, Reduced | 0, Normal | 9, Do not know / not tested	genmove_ext_c0
	Blocked or reduced mobility of columna lumbalis - Right lateral flexion	2, Blocked | 1, Reduced | 0, Normal | 9, Do not know / not tested	genmove_rlat_c0
	Blocked or reduced mobility of columna lumbalis - Left lateral flexion	2, Blocked | 1, Reduced | 0, Normal | 9, Do not know / not tested	genmove_llat_c0
	Blocked or reduced mobility of columna lumbalis - Right rotation	2, Blocked | 1, Reduced | 0, Normal | 9, Do not know / not tested	genmove_rrot_c0
	Blocked or reduced mobility of columna lumbalis - Left rotation	2, Blocked | 1, Reduced | 0, Normal | 9, Do not know / not tested	genmove_lrot_c0
	Blocked or reduced mobility of columna lumbalis - Finger-floor distance at flexion (cm)	Integer	genmove_flex_cm_c0
	Modified Schober's Test - Positive?	1, Yes / positive | 0, No / negative | 9, Do not know / not tested	schob_c0
	Modified Schober's Test - Increase of distance by modified Schober test (cm)?	Integer	schob_cm_c0	Item skipped unless schob_c0="1". Recoded as ".a" if schob_c0="0" OR schob_c0="9"
Inspection	Abnormal posture (Unusual or abnormal displacement of the upper body in relation to the pelvis. It does not have to be a parallel displacement)?	1, Yes / positive | 0, No / negative | 9, Do not know / not tested	defence_c0
Motion palpation	Soreness or stiffness of inter-segmental movement?	0, Nothing abnormal | 1, Positive findings | 9, Do not know / not tested	intersegstiff_c0
	Soreness or stiffness of inter-segmental movement - Th12-L1?	1, Soreness | 2, Reduced Mobility | 9, Do not know / not tested	intersegstiff_th12_c0	Item skipped unless intersegstiff_c0="1". Recoded as "0" if intersegstiff_c0="0" OR as "9" if intersegstiff_c0="9". Missing recoded as "0" if intersegstiff_c0=1 unless all sub-items are missing.
	Soreness or stiffness of inter-segmental movement - L1-L2?	1, Soreness | 2, Reduced Mobility | 9, Do not know / not tested	intersegstiff_l1_c0	Item skipped unless intersegstiff_c0="1". Recoded as "0" if intersegstiff_c0="0" OR as "9" if intersegstiff_c0="9". Missing recoded as "0" if intersegstiff_c0=1 unless all sub-items are missing.
	Soreness or stiffness of inter-segmental movement - L2-L3?	1, Soreness | 2, Reduced Mobility | 9, Do not know / not tested	intersegstiff_l2_c0	Item skipped unless intersegstiff_c0="1". Recoded as "0" if intersegstiff_c0="0" OR as "9" if intersegstiff_c0="9". Missing recoded as "0" if intersegstiff_c0=1 unless all sub-items are missing.
	Soreness or stiffness of inter-segmental movement - L3-L4?	1, Soreness | 2, Reduced Mobility | 9, Do not know / not tested	intersegstiff_l3_c0	Item skipped unless intersegstiff_c0="1". Recoded as "0" if intersegstiff_c0="0" OR as "9" if intersegstiff_c0="9". Missing recoded as "0" if intersegstiff_c0=1 unless all sub-items are missing.
	Soreness or stiffness of inter-segmental movement - L4-L5?	1, Soreness | 2, Reduced Mobility | 9, Do not know / not tested	intersegstiff_l4_c0	Item skipped unless intersegstiff_c0="1". Recoded as "0" if intersegstiff_c0="0" OR as "9" if intersegstiff_c0="9". Missing recoded as "0" if intersegstiff_c0=1 unless all sub-items are missing.
	Soreness or stiffness of inter-segmental movement - L5-S1?	1, Soreness | 2, Reduced Mobility | 9, Do not know / not tested	intersegstiff_l5_c0	Item skipped unless intersegstiff_c0="1". Recoded as "0" if intersegstiff_c0="0" OR as "9" if intersegstiff_c0="9". Missing recoded as "0" if intersegstiff_c0=1 unless all sub-items are missing.
Orthopaedic examination	Pain at percussion of processus spinosus?	0, Nothing abnormal | 1, Positive findings | 9, Do not know / not tested	intersegperc_c0
	Pain at percussion of processus spinosus - Th12-L1?	1, Yes / positive | 0, No / negative | 9, Do not know / not tested	intersegperc_th12_c0	Item skipped unless intersegperc_c0="1". Recoded as "0" if intersegperc_c0="0" OR as "9" if intersegperc_c0="9". Missing recoded as "0" if intersegperc_c0=1 unless all sub-items are missing.
	Pain at percussion of processus spinosus - L1-L2?	1, Yes / positive | 0, No / negative | 9, Do not know / not tested	intersegperc_l1_c0	Item skipped unless intersegperc_c0="1". Recoded as "0" if intersegperc_c0="0" OR as "9" if intersegperc_c0="9". Missing recoded as "0" if intersegperc_c0=1 unless all sub-items are missing.
	Pain at percussion of processus spinosus - L2-L3?	1, Yes / positive | 0, No / negative | 9, Do not know / not tested	intersegperc_l2_c0	Item skipped unless intersegperc_c0="1". Recoded as "0" if intersegperc_c0="0" OR as "9" if intersegperc_c0="9". Missing recoded as "0" if intersegperc_c0=1 unless all sub-items are missing.
	Pain at percussion of processus spinosus - L3-L4?	1, Yes / positive | 0, No / negative | 9, Do not know / not tested	intersegperc_l3_c0	Item skipped unless intersegperc_c0="1". Recoded as "0" if intersegperc_c0="0" OR as "9" if intersegperc_c0="9". Missing recoded as "0" if intersegperc_c0=1 unless all sub-items are missing.
	Pain at percussion of processus spinosus - L4-L5?	1, Yes / positive | 0, No / negative | 9, Do not know / not tested	intersegperc_l4_c0	Item skipped unless intersegperc_c0="1". Recoded as "0" if intersegperc_c0="0" OR as "9" if intersegperc_c0="9". Missing recoded as "0" if intersegperc_c0=1 unless all sub-items are missing.
	Pain at percussion of processus spinosus - L5-S1?	1, Yes / positive | 0, No / negative | 9, Do not know / not tested	intersegperc_l5_c0	Item skipped unless intersegperc_c0="1". Recoded as "0" if intersegperc_c0="0" OR as "9" if intersegperc_c0="9". Missing recoded as "0" if intersegperc_c0=1 unless all sub-items are missing.
	Pain at SI-joint - Gaenslen's test?	1, Yes / positive | 0, No / negative | 9, Do not know / not tested	si_gaenslen_c0
	Pain at SI-joint - Posterior Pelvic Pain Provocation / Thigh thrust?	1, Yes / positive | 0, No / negative | 9, Do not know / not tested	si_pppp_c0
	Pain at SI-joint - Sacral thrust?	1, Yes / positive | 0, No / negative | 9, Do not know / not tested	si_sacral_c0
	Step-off between processus spinosi in columna - Positive obs. spondylolisthesis?	1, Yes / positive | 0, No / negative | 9, Do not know / not tested	procspin_c0
	Step-off between processus spinosi in columna - Th12-L1?	1, Yes / positive | 0, No / negative	procspin_th12_c0	Item skipped unless procspin_c0="1". Recoded as "0" if procspin_c0="0" OR as "9" if procspin_c0="9". Missing recoded as "0" if procspin_c0=1 unless all sub-items are missing.
	Step-off between processus spinosi in columna - L1-L2?	1, Yes / positive | 0, No / negative	procspin_l1_c0	Item skipped unless procspin_c0="1". Recoded as "0" if procspin_c0="0" OR as "9" if procspin_c0="9". Missing recoded as "0" if procspin_c0=1 unless all sub-items are missing.
	Step-off between processus spinosi in columna - L2-L3?	1, Yes / positive | 0, No / negative	procspin_l2_c0	Item skipped unless procspin_c0="1". Recoded as "0" if procspin_c0="0" OR as "9" if procspin_c0="9". Missing recoded as "0" if procspin_c0=1 unless all sub-items are missing.
	Step-off between processus spinosi in columna - L3-L4?	1, Yes / positive | 0, No / negative	procspin_l3_c0	Item skipped unless procspin_c0="1". Recoded as "0" if procspin_c0="0" OR as "9" if procspin_c0="9". Missing recoded as "0" if procspin_c0=1 unless all sub-items are missing.
	Step-off between processus spinosi in columna - L4-L5?	1, Yes / positive | 0, No / negative	procspin_l4_c0	Item skipped unless procspin_c0="1". Recoded as "0" if procspin_c0="0" OR as "9" if procspin_c0="9". Missing recoded as "0" if procspin_c0=1 unless all sub-items are missing.
	Step-off between processus spinosi in columna - L5-S1?	1, Yes / positive | 0, No / negative	procspin_l5_c0	Item skipped unless procspin_c0="1". Recoded as "0" if procspin_c0="0" OR as "9" if procspin_c0="9". Missing recoded as "0" if procspin_c0=1 unless all sub-items are missing.
	Axial compression test of columna - Positive (trigger pain)?	1, Yes / positive | 0, No / negative | 9, Do not know / not tested	axcomp_c0
Neuroligical examination	Straight Leg Raise Test (SLR) - RIGHT - (L4, L5, S1) and reverse SLR (L2, L3)	0, Nothing abnormal | 1, Muscle tension only at SBL / reverse SBL | 2, Positive findings in addition to muscle tension | 9, Do not know / not tested	sblr_c0	Item skipped unless legpain_c0="1". Recoded as ".a" if legpain_c0="0"
	Straight Leg Raise Test - RIGHT - Positive?	0, No | 1, Yes	sblrpos_c0	Item skipped unless sblr_c0="2". Recoded as "0" if sblr_c0="0" OR sblr_c0="1". Recoded as "9" if sblr_c0="9". Missing recoded as "0" if sblr_c0="2" unless all sub-items are missing.
	Straight Leg Raise Test - RIGHT - No. of degrees at positive SLR?	Integer	sblrposdg_c0	Item skipped unless sblrpos_c0="1". Recoded as ".a" if sblrpos_c0="0" OR sblrpos_c0="9"
	Straight Leg Raise Test - RIGHT - Positive reverse (pain in anterior thigh)?	0, No | 1, Yes	sblrrev_c0	Item skipped unless sblr_c0="2". Recoded as "0" if sblr_c0="0" OR sblr_c0="1". Recoded as "9" if sblr_c0="9". Missing recoded as "0" if sblr_c0="2" unless all sub-items are missing.
	Straight Leg Raise Test - RIGHT - Aggravation by dorsiflexion of ankle?	0, No | 1, Yes	sblrdors_c0	Item skipped unless sblr_c0="2". Recoded as "0" if sblr_c0="0" OR sblr_c0="1". Recoded as "9" if sblr_c0="9". Missing recoded as "0" if sblr_c0="2" unless all sub-items are missing.
	Straight Leg Raise Test - LEFT - (L4, L5, S1) and reverse SLR (L2, L3)	0, Nothing abnormal | 1, Muscle tension only at SBL / reverse SBL | 2, Positive findings in addition to muscle tension | 9, Do not know / not tested	sbll_c0	Item skipped unless legpain_c0="1". Recoded as ".a" if legpain_c0="0"
	Straight Leg Raise Test - LEFT - Positive?	0, No | 1, Yes	sbllpos_c0	Item skipped unless sbll_c0="2". Recoded as "0" if sbll_c0="0" OR sbll_c0="1". Recoded as "9" if sbll_c0="9". Missing recoded as "0" if sbll_c0="2" unless all sub-items are missing.
	Straight Leg Raise Test - LEFT - No. of degrees at positive SLR?	Integer	sbllposdg_c0	Item skipped unless sbllpos_c0="1". Recoded as ".a" if sbllpos_c0="0" OR sbllpos_c0="9"
	Straight Leg Raise Test - LEFT - Positive reverse (pain in anterior thigh)?	0, No | 1, Yes	sbllrev_c0	Item skipped unless sbll_c0="2". Recoded as "0" if sbll_c0="0" OR sbll_c0="1". Recoded as "9" if sbll_c0="9". Missing recoded as "0" if sbll_c0="2" unless all sub-items are missing.
	Straight Leg Raise Test - LEFT - Aggravation by dorsiflexion of ankle?	0, No | 1, Yes	sblldors_c0	Item skipped unless sbll_c0="2". Recoded as "0" if sbll_c0="0" OR sbll_c0="1". Recoded as "9" if sbll_c0="9". Missing recoded as "0" if sbll_c0="2" unless all sub-items are missing.
	Muscle power - RIGHT Lower Extremity (LE)	0, Nothing abnormal | 1, Positive findings | 9, Do not know / not tested	powerr_c0	Item skipped unless legpain_c0="1". Recoded as ".a" if legpain_c0="0"
	Muscle power - Hip flexion (L1-L3) (Iliopsoas)	5, Normal strength 5 | 4, Active movement possible against external resistance 4 | 3, Can be moved, but only against the gravity 3 | 2, Can be moved, but only if gravity is eliminated 2 | 1, Visible muscle reaction but no active movement 1 | 0, No visible or palpable contraction 0 | 9, not tested 9	powerr_flex_c0	Item skipped unless powerr_c0="1". Recoded as "5" if powerr_c0="0". Recoded as "9" if powerr_c0="9". Missing recoded as "5" if powerr_c0="1" unless all sub-items are missing.
	Muscle power - Knee extension (L4) (By squatting and raising again) (Quadriceps)	5, Normal strength 5 | 4, Active movement possible against external resistance 4 | 3, Can be moved, but only against the gravity 3 | 2, Can be moved, but only if gravity is eliminated 2 | 1, Visible muscle reaction but no active movement 1 | 0, No visible or palpable contraction 0 | 9, not tested 9	powerr_kneeext_c0	Item skipped unless powerr_c0="1". Recoded as "5" if powerr_c0="0". Recoded as "9" if powerr_c0="9". Missing recoded as "5" if powerr_c0="1" unless all sub-items are missing.
	Muscle power - Knee flexion (L5) (heel walking) (hamstrings)	5, Normal strength 5 | 4, Active movement possible against external resistance 4 | 3, Can be moved, but only against the gravity 3 | 2, Can be moved, but only if gravity is eliminated 2 | 1, Visible muscle reaction but no active movement 1 | 0, No visible or palpable contraction 0 | 9, not tested 9	powerr_kneeflex_c0	Item skipped unless powerr_c0="1". Recoded as "5" if powerr_c0="0". Recoded as "9" if powerr_c0="9". Missing recoded as "5" if powerr_c0="1" unless all sub-items are missing.
	Muscle power - Dorsal flexion ankle (L5) (Inward rotation at heel walking) (Tibialis ant.)	5, Normal strength 5 | 4, Active movement possible against external resistance 4 | 3, Can be moved, but only against the gravity 3 | 2, Can be moved, but only if gravity is eliminated 2 | 1, Visible muscle reaction but no active movement 1 | 0, No visible or palpable contraction 0 | 9, not tested 9	powerr_dorsflex_c0	Item skipped unless powerr_c0="1". Recoded as "5" if powerr_c0="0". Recoded as "9" if powerr_c0="9". Missing recoded as "5" if powerr_c0="1" unless all sub-items are missing.
	Muscle power - Plantar flexion ankle (S1) (Peroneus L & B)	5, Normal strength 5 | 4, Active movement possible against external resistance 4 | 3, Can be moved, but only against the gravity 3 | 2, Can be moved, but only if gravity is eliminated 2 | 1, Visible muscle reaction but no active movement 1 | 0, No visible or palpable contraction 0 | 9, not tested 9	powerr_planflex_c0	Item skipped unless powerr_c0="1". Recoded as "5" if powerr_c0="0". Recoded as "9" if powerr_c0="9". Missing recoded as "5" if powerr_c0="1" unless all sub-items are missing.
	Muscle power - Extension 1st toe (L5) (Ext. Hallucis Longus)	5, Normal strength 5 | 4, Active movement possible against external resistance 4 | 3, Can be moved, but only against the gravity 3 | 2, Can be moved, but only if gravity is eliminated 2 | 1, Visible muscle reaction but no active movement 1 | 0, No visible or palpable contraction 0 | 9, not tested 9	powerr_ext1toe_c0	Item skipped unless powerr_c0="1". Recoded as "5" if powerr_c0="0". Recoded as "9" if powerr_c0="9". Missing recoded as "5" if powerr_c0="1" unless all sub-items are missing.
	Muscle power - Fleksion 1st toe (S1) (toewalking) (Gastrocnemius / Soleus)	5, Normal strength 5 | 4, Active movement possible against external resistance 4 | 3, Can be moved, but only against the gravity 3 | 2, Can be moved, but only if gravity is eliminated 2 | 1, Visible muscle reaction but no active movement 1 | 0, No visible or palpable contraction 0 | 9, not tested 9	powerr_flex1toe_c0	Item skipped unless powerr_c0="1". Recoded as "5" if powerr_c0="0". Recoded as "9" if powerr_c0="9". Missing recoded as "5" if powerr_c0="1" unless all sub-items are missing.
	Muscle power - Inversion ankle (L4) (standing on the outer part of the foot) (Tibialis ant.)	5, Normal strength 5 | 4, Active movement possible against external resistance 4 | 3, Can be moved, but only against the gravity 3 | 2, Can be moved, but only if gravity is eliminated 2 | 1, Visible muscle reaction but no active movement 1 | 0, No visible or palpable contraction 0 | 9, not tested 9	powerr_inver_c0	Item skipped unless powerr_c0="1". Recoded as "5" if powerr_c0="0". Recoded as "9" if powerr_c0="9". Missing recoded as "5" if powerr_c0="1" unless all sub-items are missing.
	Muscle power - Eversion ankle (S1) (standing on the inner part of the foot) (Peroneus L & B)	5, Normal strength 5 | 4, Active movement possible against external resistance 4 | 3, Can be moved, but only against the gravity 3 | 2, Can be moved, but only if gravity is eliminated 2 | 1, Visible muscle reaction but no active movement 1 | 0, No visible or palpable contraction 0 | 9, not tested 9	powerr_ever_c0	Item skipped unless powerr_c0="1". Recoded as "5" if powerr_c0="0". Recoded as "9" if powerr_c0="9". Missing recoded as "5" if powerr_c0="1" unless all sub-items are missing.
	Muscle power - Reduced muscle power in the entire right leg?	0, No | 1, Yes	powerr_red_c0	Item skipped unless powerr_c0="1". Recoded as "0" if powerr_c0="0".
	Muscle power - LEFT LE	0, Nothing abnormal | 1, Positive findings | 9, Do not know / not tested	powerl_c0	Item skipped unless legpain_c0="1". Recoded as ".a" if legpain_c0="0"
	Muscle power - Hip flexion (L1-L3) (Iliopsoas)	5, Normal strength 5 | 4, Active movement possible against external resistance 4 | 3, Can be moved, but only against the gravity 3 | 2, Can be moved, but only if gravity is eliminated 2 | 1, Visible muscle reaction but no active movement 1 | 0, No visible or palpable contraction 0 | 9, not tested 9	powerl_flex_c0	Item skipped unless powerl_c0="1". Recoded as "5" if powerl_c0="0". Recoded as "9" if powerl_c0="9". Missing recoded as "5" if powerl_c0="1" unless all sub-items are missing.
	Muscle power - Knee extension (L4) (By squatting and raising again) (Quadriceps)	5, Normal strength 5 | 4, Active movement possible against external resistance 4 | 3, Can be moved, but only against the gravity 3 | 2, Can be moved, but only if gravity is eliminated 2 | 1, Visible muscle reaction but no active movement 1 | 0, No visible or palpable contraction 0 | 9, not tested 9	powerl_kneeext_c0	Item skipped unless powerl_c0="1". Recoded as "5" if powerl_c0="0". Recoded as "9" if powerl_c0="9". Missing recoded as "5" if powerl_c0="1" unless all sub-items are missing.
	Muscle power - Knee flexion (L5) (heel walking) (hamstrings)	5, Normal strength 5 | 4, Active movement possible against external resistance 4 | 3, Can be moved, but only against the gravity 3 | 2, Can be moved, but only if gravity is eliminated 2 | 1, Visible muscle reaction but no active movement 1 | 0, No visible or palpable contraction 0 | 9, not tested 9	powerl_kneeflex_c0	Item skipped unless powerl_c0="1". Recoded as "5" if powerl_c0="0". Recoded as "9" if powerl_c0="9". Missing recoded as "5" if powerl_c0="1" unless all sub-items are missing.
	Muscle power - Dorsal flexion ankle (L5) (Inward rotation at heel walking) (Tibialis ant.)	5, Normal strength 5 | 4, Active movement possible against external resistance 4 | 3, Can be moved, but only against the gravity 3 | 2, Can be moved, but only if gravity is eliminated 2 | 1, Visible muscle reaction but no active movement 1 | 0, No visible or palpable contraction 0 | 9, not tested 9	powerl_dorsflex_c0	Item skipped unless powerl_c0="1". Recoded as "5" if powerl_c0="0". Recoded as "9" if powerl_c0="9". Missing recoded as "5" if powerl_c0="1" unless all sub-items are missing.
	Muscle power - Plantar flexion ankle (S1) (Peroneus L & B)	5, Normal strength 5 | 4, Active movement possible against external resistance 4 | 3, Can be moved, but only against the gravity 3 | 2, Can be moved, but only if gravity is eliminated 2 | 1, Visible muscle reaction but no active movement 1 | 0, No visible or palpable contraction 0 | 9, not tested 9	powerl_planflex_c0	Item skipped unless powerl_c0="1". Recoded as "5" if powerl_c0="0". Recoded as "9" if powerl_c0="9". Missing recoded as "5" if powerl_c0="1" unless all sub-items are missing.
	Muscle power - Extension 1st toe (L5) (Ext. Hallucis Longus)	5, Normal strength 5 | 4, Active movement possible against external resistance 4 | 3, Can be moved, but only against the gravity 3 | 2, Can be moved, but only if gravity is eliminated 2 | 1, Visible muscle reaction but no active movement 1 | 0, No visible or palpable contraction 0 | 9, not tested 9	powerl_ext1toe_c0	Item skipped unless powerl_c0="1". Recoded as "5" if powerl_c0="0". Recoded as "9" if powerl_c0="9". Missing recoded as "5" if powerl_c0="1" unless all sub-items are missing.
	Muscle power - Fleksion 1st toe (S1) (toe walking) (Gastrocnemius / Soleus)	5, Normal strength 5 | 4, Active movement possible against external resistance 4 | 3, Can be moved, but only against the gravity 3 | 2, Can be moved, but only if gravity is eliminated 2 | 1, Visible muscle reaction but no active movement 1 | 0, No visible or palpable contraction 0 | 9, not tested 9	powerl_flex1toe_c0	Item skipped unless powerl_c0="1". Recoded as "5" if powerl_c0="0". Recoded as "9" if powerl_c0="9". Missing recoded as "5" if powerl_c0="1" unless all sub-items are missing.
	Muscle power - Inversion ankle (L4) (standing on the outer part of the foot) (Tibialis ant.)	5, Normal strength 5 | 4, Active movement possible against external resistance 4 | 3, Can be moved, but only against the gravity 3 | 2, Can be moved, but only if gravity is eliminated 2 | 1, Visible muscle reaction but no active movement 1 | 0, No visible or palpable contraction 0 | 9, not tested 9	powerl_inver_c0	Item skipped unless powerl_c0="1". Recoded as "5" if powerl_c0="0". Recoded as "9" if powerl_c0="9". Missing recoded as "5" if powerl_c0="1" unless all sub-items are missing.
	Muscle power - Eversion ankle (S1) (standing on the inner part of the foot) (Peroneus L & B)	5, Normal strength 5 | 4, Active movement possible against external resistance 4 | 3, Can be moved, but only against the gravity 3 | 2, Can be moved, but only if gravity is eliminated 2 | 1, Visible muscle reaction but no active movement 1 | 0, No visible or palpable contraction 0 | 9, not tested 9	powerl_ever_c0	Item skipped unless powerl_c0="1". Recoded as "5" if powerl_c0="0". Recoded as "9" if powerl_c0="9". Missing recoded as "5" if powerl_c0="1" unless all sub-items are missing.
	Muscle power - Reduced muscle power in the entire left leg?	0, No | 1, Yes	powerl_red_c0	Item skipped unless powerl_c0="1". Recoded as "0" if powerl_c0="0".
	Trendelenburg - RIGHT test - Positive?	1, Yes / positive | 0, No / negative | 9, Do not know / not tested	trendr_c0	Item skipped unless legpain_c0="1". Recoded as ".a" if legpain_c0="0"
	Trendelenburg - LEFT test - Positive?	1, Yes / positive | 0, No / negative | 9, Do not know / not tested	trendl_c0	Item skipped unless legpain_c0="1". Recoded as ".a" if legpain_c0="0"
	Sensitivity - RIGHT LE - Changed sensitivity at pricking and/or touching	0, Nothing abnormal | 1, Positive findings | 9, Do not know / not tested	sensr_c0	Item skipped unless legpain_c0="1". Recoded as ".a" if legpain_c0="0"
	Sensitivity - L2 dermatom	1, Reduced Sensitivity 1 | 2, Normal 2 | 3, Hyper-sensitivity 3 | 9, Not tested 9	sensr_l2_c0	Item skipped unless sensr_c0="1". Recoded as "2" if sensr_c0="0". Recoded as "9" if sensr_c0="9". Missing recoded as "2" if sensr_c0="1" unless all sub-items are missing.
	Sensitivity - L3 dermatom	1, Reduced Sensitivity 1 | 2, Normal 2 | 3, Hyper-sensitivity 3 | 9, Not tested 10	sensr_l3_c0	Item skipped unless sensr_c0="1". Recoded as "2" if sensr_c0="0". Recoded as "9" if sensr_c0="9". Missing recoded as "2" if sensr_c0="1" unless all sub-items are missing.
	Sensitivity - L4 dermatom	1, Reduced Sensitivity 1 | 2, Normal 2 | 3, Hyper-sensitivity 3 | 9, Not tested 11	sensr_l4_c0	Item skipped unless sensr_c0="1". Recoded as "2" if sensr_c0="0". Recoded as "9" if sensr_c0="9". Missing recoded as "2" if sensr_c0="1" unless all sub-items are missing.
	Sensitivity - L5 dermatom	1, Reduced Sensitivity 1 | 2, Normal 2 | 3, Hyper-sensitivity 3 | 9, Not tested 12	sensr_l5_c0	Item skipped unless sensr_c0="1". Recoded as "2" if sensr_c0="0". Recoded as "9" if sensr_c0="9". Missing recoded as "2" if sensr_c0="1" unless all sub-items are missing.
	Sensitivity - S1 dermatom	1, Reduced Sensitivity 1 | 2, Normal 2 | 3, Hyper-sensitivity 3 | 9, Not tested 13	sensr_s1_c0	Item skipped unless sensr_c0="1". Recoded as "2" if sensr_c0="0". Recoded as "9" if sensr_c0="9". Missing recoded as "2" if sensr_c0="1" unless all sub-items are missing.
	Sensitivity - Non-dermatomal sensitivity disorder	1, Reduced Sensitivity 1 | 2, Normal 2 | 3, Hyper-sensitivity 3 | 9, Not tested 14	sensr_non_c0	Item skipped unless sensr_c0="1". Recoded as "2" if sensr_c0="0". Recoded as "9" if sensr_c0="9". Missing recoded as "2" if sensr_c0="1" unless all sub-items are missing.
	Sensitivity - LEFT LE - Changed sensitivity at pricking and/or touching	0, Nothing abnormal | 1, Positive findings | 9, Do not know / not tested	sensl_c0	Item skipped unless legpain_c0="1". Recoded as ".a" if legpain_c0="0"
	Sensitivity - L2 dermatom	1, Reduced Sensitivity 1 | 2, Normal 2 | 3, Hyper-sensitivity 3 | 9, Not tested 9	sensl_l2_c0	Item skipped unless sensl_c0="1". Recoded as "2" if sensl_c0="0". Recoded as "9" if sensl_c0="9". Missing recoded as "2" if sensl_c0="1" unless all sub-items are missing.
	Sensitivity - L3 dermatom	1, Reduced Sensitivity 1 | 2, Normal 2 | 3, Hyper-sensitivity 3 | 9, Not tested 9	sensl_l3_c0	Item skipped unless sensl_c0="1". Recoded as "2" if sensl_c0="0". Recoded as "9" if sensl_c0="9". Missing recoded as "2" if sensl_c0="1" unless all sub-items are missing.
	Sensitivity - L4 dermatom	1, Reduced Sensitivity 1 | 2, Normal 2 | 3, Hyper-sensitivity 3 | 9, Not tested 9	sensl_l4_c0	Item skipped unless sensl_c0="1". Recoded as "2" if sensl_c0="0". Recoded as "9" if sensl_c0="9". Missing recoded as "2" if sensl_c0="1" unless all sub-items are missing.
	Sensitivity - L5 dermatom	1, Reduced Sensitivity 1 | 2, Normal 2 | 3, Hyper-sensitivity 3 | 9, Not tested 9	sensl_l5_c0	Item skipped unless sensl_c0="1". Recoded as "2" if sensl_c0="0". Recoded as "9" if sensl_c0="9". Missing recoded as "2" if sensl_c0="1" unless all sub-items are missing.
	Sensitivity - S1 dermatom	1, Reduced Sensitivity 1 | 2, Normal 2 | 3, Hyper-sensitivity 3 | 9, Not tested 9	sensl_s1_c0	Item skipped unless sensl_c0="1". Recoded as "2" if sensl_c0="0". Recoded as "9" if sensl_c0="9". Missing recoded as "2" if sensl_c0="1" unless all sub-items are missing.
	Sensitivity - Non-dermatomal sensitivity disorder	1, Reduced Sensitivity 1 | 2, Normal 2 | 3, Hyper-sensitivity 3 | 9, Not tested 9	sensl_non_c0	Item skipped unless sensl_c0="1". Recoded as "2" if sensl_c0="0". Recoded as "9" if sensl_c0="9". Missing recoded as "2" if sensl_c0="1" unless all sub-items are missing.
	Reflexes - RIGHT LE	0, Nothing abnormal | 1, Positive findings | 9, Do not know / not tested	reflexr_c0	Item skipped unless legpain_c0="1". Recoded as ".a" if legpain_c0="0"
	Reflexes - Patella reflex (L4)	0, No response 0 | 1, hypo-reflex 1 | 2, Normal 2 | 3, Hyper-reflex 3 | 4, Severe hyper-reflex with passing clonus 4 | 5, Hyper-relfex with persistent Clonus 5 | 9, Not tested 9	reflexr_pat_c0	Item skipped unless reflexr_c0="1". Recoded as "2" if reflexr_c0="0". Recoded as "9" if reflexr_c0="9". Missing recoded as "2" if reflexr_c0="1" unless all sub-items are missing.
	Reflexes - Hamstring reflex (L5)	0, No response 0 | 1, hypo-reflex 1 | 2, Normal 2 | 3, Hyper-reflex 3 | 4, Severe hyper-reflex with passing clonus 4 | 5, Hyper-relfex with persistent Clonus 5 | 9, Not tested 9	reflexr_ham_c0	Item skipped unless reflexr_c0="1". Recoded as "2" if reflexr_c0="0". Recoded as "9" if reflexr_c0="9". Missing recoded as "2" if reflexr_c0="1" unless all sub-items are missing.
	Reflexes - Achilles reflex (S1)	0, No response 0 | 1, hypo-reflex 1 | 2, Normal 2 | 3, Hyper-reflex 3 | 4, Severe hyper-reflex with passing clonus 4 | 5, Hyper-relfex with persistent Clonus 5 | 9, Not tested 9	reflexr_ach_c0	Item skipped unless reflexr_c0="1". Recoded as "2" if reflexr_c0="0". Recoded as "9" if reflexr_c0="9". Missing recoded as "2" if reflexr_c0="1" unless all sub-items are missing.
	Reflexes - LEFT LE	0, Nothing abnormal | 1, Positive findings | 9, Do not know / not tested	reflexl_c0	Item skipped unless legpain_c0="1". Recoded as ".a" if legpain_c0="0"
	Reflexes - Patella reflex (L4)	0, No response 0 | 1, hypo-reflex 1 | 2, Normal 2 | 3, Hyper-reflex 3 | 4, Severe hyper-reflex with passing clonus 4 | 5, Hyper-relfex with persistent Clonus 5 | 9, Not tested 9	reflexl_pat_c0	Item skipped unless reflexl_c0="1". Recoded as "2" if reflexl_c0="0". Recoded as "9" if reflexl_c0="9". Missing recoded as "2" if reflexl_c0="1" unless all sub-items are missing.
	Reflexes - Hamstring reflex (L5)	0, No response 0 | 1, hypo-reflex 1 | 2, Normal 2 | 3, Hyper-reflex 3 | 4, Severe hyper-reflex with passing clonus 4 | 5, Hyper-relfex with persistent Clonus 5 | 9, Not tested 9	reflexl_ham_c0	Item skipped unless reflexl_c0="1". Recoded as "2" if reflexl_c0="0". Recoded as "9" if reflexl_c0="9". Missing recoded as "2" if reflexl_c0="1" unless all sub-items are missing.
	Reflexes - Achilles reflex (S1)	0, No response 0 | 1, hypo-reflex 1 | 2, Normal 2 | 3, Hyper-reflex 3 | 4, Severe hyper-reflex with passing clonus 4 | 5, Hyper-relfex with persistent Clonus 5 | 9, Not tested 9	reflexl_ach_c0	Item skipped unless reflexl_c0="1". Recoded as "2" if reflexl_c0="0". Recoded as "9" if reflexl_c0="9". Missing recoded as "2" if reflexl_c0="1" unless all sub-items are missing.
	Drop foot - Does the patient have foot drop?	0, No | 1, yes, foot drop on both feet | 2, yes, foot drop right | 3, yes,foot drop left	drop_c0	Item skipped unless legpain_c0="1". Recoded as ".a" if legpain_c0="0"
	Drop foot - Is the foot drop …	1, ... a new incident | 2, ... previously known	dropknown_c0	Item skipped unless drop_c0="1". Recoded as ".a" if drop_c0="0" Or drop_c0=".a"
	Positive plantar respons - RIGHT - with Babinski response?	1, Yes / positive | 0, No / negative | 9, Do not know / not tested	plantresr_c0	Item skipped unless legpain_c0="1". Recoded as ".a" if legpain_c0="0"
	Positive plantar respons - LEFT - with Babinski response?	1, Yes / positive | 0, No / negative | 9, Do not know / not tested	plantresl_c0	Item skipped unless legpain_c0="1". Recoded as ".a" if legpain_c0="0"
Red flags / Patient history	Red flags - Suspected change of bladder or intestinal control?	1, Yes / positive | 0, No / negative | 9, Do not know / not tested	redflag_blad_c0	Item skipped unless legpain_c0="1". Recoded as ".a" if legpain_c0="0"
	Red flags - Changed sensititity in the groin?	1, Yes / positive | 0, No / negative | 9, Do not know / not tested	redflag_sens_c0	Item skipped unless legpain_c0="1". Recoded as ".a" if legpain_c0="0"
	Red flags - Bilateral pareses in the legs?	1, Yes / positive | 0, No / negative | 9, Do not know / not tested	redflag_bipar_c0	Item skipped unless legpain_c0="1". Recoded as ".a" if legpain_c0="0"
	Red flags - Progressing pareses in the legs?	1, Yes / positive | 0, No / negative | 9, Do not know / not tested	redflag_propar_c0	Item skipped unless legpain_c0="1". Recoded as ".a" if legpain_c0="0"
	Red flags - Abnormal perianal sensitivity?	1, Yes / positive | 0, No / negative | 9, Do not know / not tested	redflag_persens_c0	Item skipped unless legpain_c0="1". Recoded as ".a" if legpain_c0="0"
	Red flags - Abnormal perianal reflexes?	1, Yes / positive | 0, No / negative | 9, Do not know / not tested	redflag_perrefl_c0	Item skipped unless legpain_c0="1". Recoded as ".a" if legpain_c0="0"
	Red flags - Abnormal sphincter tonus?	1, Yes / positive | 0, No / negative | 9, Do not know / not tested	redflag_sphton_c0	Item skipped unless legpain_c0="1". Recoded as ".a" if legpain_c0="0"
	Red flags - Abnormal sphincter strength?	1, Yes / positive | 0, No / negative | 9, Do not know / not tested	redflag_sphpow_c0	Item skipped unless legpain_c0="1". Recoded as ".a" if legpain_c0="0"
	Neurogenic pain - Constant radicular pain, without positive SLR / reverse SLR?	1, Yes / positive | 0, No / negative | 9, Do not know / not tested	neu_perspain_c0	Item skipped unless legpain_c0="1". Recoded as ".a" if legpain_c0="0"
	Neurogenic pain - Burning pain?	1, Yes / positive | 0, No / negative | 9, Do not know / not tested	neu_burnpain_c0	Item skipped unless legpain_c0="1". Recoded as ".a" if legpain_c0="0"
	Neurogenic pain - No change in symptoms (better / worse)?	1, Yes / positive | 0, No / negative | 9, Do not know / not tested	neu_nochange_c0	Item skipped unless legpain_c0="1". Recoded as ".a" if legpain_c0="0"
	Suspected inflammatory back pain - Suspected inflammatory back disease as cause of back pain?	1, Yes | 0, No | 9, Dont know	otherilla_c0
	Suspected inflammatory back pain - Morning stiffness?	1, Yes / positive | 0, No / negative | 9, Do not know / not tested	otherill_stiff_c0	Item skipped unless otherilla_c0="1". Recoded as "0" if otherilla_c0="0". Recoded as "9" if otherilla_c0="9". Missing recoded as "0" if otherilla_c0="1" unless all sub-items are missing.
	Suspected inflammatory back pain - Disturbed sleep at the end of the night?	1, Yes / positive | 0, No / negative | 9, Do not know / not tested	otherill_sleep_c0	Item skipped unless otherilla_c0="1". Recoded as "0" if otherilla_c0="0". Recoded as "9" if otherilla_c0="9". Missing recoded as "0" if otherilla_c0="1" unless all sub-items are missing.
	Suspected inflammatory back pain - Pain while resting - relieved by activity?	1, Yes / positive | 0, No / negative | 9, Do not know / not tested	otherill_restpain_c0	Item skipped unless otherilla_c0="1". Recoded as "0" if otherilla_c0="0". Recoded as "9" if otherilla_c0="9". Missing recoded as "0" if otherilla_c0="1" unless all sub-items are missing.
	Suspected inflammatory back pain - Other joint problems?	1, Yes / positive | 0, No / negative | 9, Do not know / not tested	otherill_joint_c0	Item skipped unless otherilla_c0="1". Recoded as "0" if otherilla_c0="0". Recoded as "9" if otherilla_c0="9". Missing recoded as "0" if otherilla_c0="1" unless all sub-items are missing.
	Suspected inflammatory back pain - Eye symptoms?	1, Yes / positive | 0, No / negative | 9, Do not know / not tested	otherill_eye_c0	Item skipped unless otherilla_c0="1". Recoded as "0" if otherilla_c0="0". Recoded as "9" if otherilla_c0="9". Missing recoded as "0" if otherilla_c0="1" unless all sub-items are missing.
	Suspected inflammatory back pain - Psoriasis / inflammatory bowel disease?	1, Yes / positive | 0, No / negative | 9, Do not know / not tested	otherill_psor_c0	Item skipped unless otherilla_c0="1". Recoded as "0" if otherilla_c0="0". Recoded as "9" if otherilla_c0="9". Missing recoded as "0" if otherilla_c0="1" unless all sub-items are missing.
	Suspected severe pathology - as cause of back pain?	1, Yes | 0, No | 9, Dont know	otherillb_c0
	Suspected severe pathology - Inexplicable weight loss?	1, Yes / positive | 0, No / negative | 9, Do not know / not tested	otherill_wloss_c0	Item skipped unless otherillb_c0="1". Recoded as "0" if otherillb_c0="0". Recoded as "9" if otherillb_c0="9". Missing recoded as "0" if otherillb_c0="1" unless all sub-items are missing.
	Suspected severe pathology - Pain at night?	1, Yes / positive | 0, No / negative | 9, Do not know / not tested	otherill_nightpain_c0	Item skipped unless otherillb_c0="1". Recoded as "0" if otherillb_c0="0". Recoded as "9" if otherillb_c0="9". Missing recoded as "0" if otherillb_c0="1" unless all sub-items are missing.
	Suspected severe pathology - Pain worst when lying down?	1, Yes / positive | 0, No / negative | 9, Do not know / not tested	otherill_liepain_c0	Item skipped unless otherillb_c0="1". Recoded as "0" if otherillb_c0="0". Recoded as "9" if otherillb_c0="9". Missing recoded as "0" if otherillb_c0="1" unless all sub-items are missing.
	Suspected severe pathology - Cancer?	1, Yes / positive | 0, No / negative | 9, Do not know / not tested	otherill_canc_c0	Item skipped unless otherillb_c0="1". Recoded as "0" if otherillb_c0="0". Recoded as "9" if otherillb_c0="9". Missing recoded as "0" if otherillb_c0="1" unless all sub-items are missing.
	Suspected severe pathology - Recent fever / sensitivity to cold?	1, Yes / positive | 0, No / negative | 9, Do not know / not tested	otherill_fever_c0	Item skipped unless otherillb_c0="1". Recoded as "0" if otherillb_c0="0". Recoded as "9" if otherillb_c0="9". Missing recoded as "0" if otherillb_c0="1" unless all sub-items are missing.
	Suspected severe pathology - Recent bacteriological / urinary tract infection?	1, Yes / positive | 0, No / negative | 9, Do not know / not tested	otherill_bac_c0	Item skipped unless otherillb_c0="1". Recoded as "0" if otherillb_c0="0". Recoded as "9" if otherillb_c0="9". Missing recoded as "0" if otherillb_c0="1" unless all sub-items are missing.
	Suspected severe pathology - Alcohol / drug abuse?	1, Yes / positive | 0, No / negative | 9, Do not know / not tested	otherill_abuse_c0	Item skipped unless otherillb_c0="1". Recoded as "0" if otherillb_c0="0". Recoded as "9" if otherillb_c0="9". Missing recoded as "0" if otherillb_c0="1" unless all sub-items are missing.
	Suspected severe pathology - Fraction by low energy trauma?	1, Yes / positive | 0, No / negative | 9, Do not know / not tested	otherill_fraclow_c0	Item skipped unless otherillb_c0="1". Recoded as "0" if otherillb_c0="0". Recoded as "9" if otherillb_c0="9". Missing recoded as "0" if otherillb_c0="1" unless all sub-items are missing.
	Suspected severe pathology - Looks ill?	1, Yes / positive | 0, No / negative | 9, Do not know / not tested	otherill_looks_c0	Item skipped unless otherillb_c0="1". Recoded as "0" if otherillb_c0="0". Recoded as "9" if otherillb_c0="9". Missing recoded as "0" if otherillb_c0="1" unless all sub-items are missing.
	Suspected severe pathology - Cold sweating?	1, Yes / positive | 0, No / negative | 9, Do not know / not tested	otherill_coldsweat_c0	Item skipped unless otherillb_c0="1". Recoded as "0" if otherillb_c0="0". Recoded as "9" if otherillb_c0="9". Missing recoded as "0" if otherillb_c0="1" unless all sub-items are missing.
	Suspected severe pathology - Sallow, pallid hue?	1, Yes / positive | 0, No / negative | 9, Do not know / not tested	otherill_pale_c0	Item skipped unless otherillb_c0="1". Recoded as "0" if otherillb_c0="0". Recoded as "9" if otherillb_c0="9". Missing recoded as "0" if otherillb_c0="1" unless all sub-items are missing.
	Suspected severe pathology - Generally reduced mobility?	1, Yes / positive | 0, No / negative | 9, Do not know / not tested	otherill_lowmob_c0	Item skipped unless otherillb_c0="1". Recoded as "0" if otherillb_c0="0". Recoded as "9" if otherillb_c0="9". Missing recoded as "0" if otherillb_c0="1" unless all sub-items are missing.
	Suspected severe pathology - "Bad" smell?	1, Yes / positive | 0, No / negative | 9, Do not know / not tested	otherill_smell_c0	Item skipped unless otherillb_c0="1". Recoded as "0" if otherillb_c0="0". Recoded as "9" if otherillb_c0="9". Missing recoded as "0" if otherillb_c0="1" unless all sub-items are missing.
	Provisional diagnosis - Uncomplicated / unspecific back pain?	1, Yes / positive | 0, No / negative | 9, Do not know / not tested	diagnose_uspec_c0
	Provisional diagnosis - Back related leg pain WITHOUT nerve root involvement?	1, Yes / positive | 0, No / negative | 9, Do not know / not tested	diagnose_noneuro_c0
	Provisional diagnosis - Back related leg pain WITH nerve root involvement?	1, Yes / positive | 0, No / negative | 9, Do not know / not tested	diagnose_withneuro_c0
	Provisional diagnosis - Fracture?	1, Yes / positive | 0, No / negative | 9, Do not know / not tested	diagnose_frac_c0
	Provisional diagnosis - Infection?	1, Yes / positive | 0, No / negative | 9, Do not know / not tested	diagnose_infec_c0
	Provisional diagnosis - Cancer?	1, Yes / positive | 0, No / negative | 9, Do not know / not tested	diagnose_cancer_c0
	Provisional diagnosis - Cauda equina syndrome?	1, Yes / positive | 0, No / negative | 9, Do not know / not tested	diagnose_cauda_c0
	Provisional diagnosis - Inflammatory rheumatoid arthritis?	1, Yes / positive | 0, No / negative | 9, Do not know / not tested	diagnose_inflam_c0
	Provisional diagnosis - State the diagnosis?	Text field	diagnosetx_c0
	Provisional diagnosis - How certain are you of the patient having a nerve root involvement (On a 0-100 scale)?	Integer	diagneuro_certain_c0	Item skipped unless diagnose_withneuro_c0="1"
	Provisional diagnosis - What do you think is the cause of the nerve root involvement (Prolapsis, stenosis, not sure)?	Text field	diagneuro_cause_c0	Item skipped unless diagnose_withneuro_c0="1"
Imaging	Is previous, relevant imaging available: Radiography	1, Yes | 0, No | 9, Dont know	previmage_radio_c0
	Is previous, relevant imaging available: MRI	1, Yes | 0, No | 9, Dont know	previmage_mr_c0
	Is previous, relevant imaging available: CT scan	1, Yes | 0, No | 9, Dont know	previmage_cy_c0
	Place for previous radiography:	Text field	previmageplace_radio_c0	Item skipped unless previmage_radio_c0="1"
	Date for previous radiography:	Text field	previmagetime_radio_c0	Item skipped unless previmage_radio_c0="1"
	Place for previous MR scan:	Text field	previmageplace_mr_c0	Item skipped unless previmage_mr_c0="1"
	Date for previous MR scan:	Text field	previmagetime_mr_c0	Item skipped unless previmage_mr_c0="1"
	Place for previous CT scan:	Text field	previmageplace_ct_c0	Item skipped unless previmage_cy_c0="1"
	Date for previous CT scan:	Text field	previmagetime_ct_c0	Item skipped unless previmage_cy_c0="1"
	Referral to Imaging: Will the patient be reffered to radiography?	1, Yes | 0, No | 9, Dont know	image_radio_c0
	Referral to Imaging: Will the patient be reffered to MRI?	1, Yes | 0, No | 9, Dont know	image_mr_c0
	Referral to Imaging: Will the patient be reffered to CT scan?	1, Yes | 0, No | 9, Dont know	image_ct_c0
	Referral to Imaging: Place for doing radiography?	1, In my own clinic | 2, At a public hospital | 3, At a private clinic / hospital	imageplace_radio_c0	Item skipped unless image_radio_c0="1"
	Referral to Imaging: Place for doing MRI?	1, In my own clinic | 2, At a public hospital | 3, At a private clinic / hospital	imageplace_mr_c0	Item skipped unless image_mr_c0="1"
	Referral to Imaging: Place for doing CT scan?	1, In my own clinic | 2, At a public hospital | 3, At a private clinic / hospital	imageplace_ct_c0	Item skipped unless image_ct_c0="1"
	Primary indications: Radicular symptoms	1, Yes	imageind_rad_c0	Item skipped unless image_radio_c0="1" OR image_mr_c0="1" OR image_ct_c0="1"
	Primary indications: Age over 50	1, Yes	imageind_age50_c0	Item skipped unless image_radio_c0="1" OR image_mr_c0="1" OR image_ct_c0="1"
	Primary indications: Significant functional limitation for 4 weeks	1, Yes	imageind_limit_c0	Item skipped unless image_radio_c0="1" OR image_mr_c0="1" OR image_ct_c0="1"
	Primary indications: Lack of response to 4 weeks of treatment	1, Yes	imageind_nores_c0	Item skipped unless image_radio_c0="1" OR image_mr_c0="1" OR image_ct_c0="1"
	Primary indications: Non-mechanical pain	1, Yes	imageind_nomek_c0	Item skipped unless image_radio_c0="1" OR image_mr_c0="1" OR image_ct_c0="1"
	Primary indications: Suspected lack of surgical fusion	1, Yes	imageind_nosurg_c0	Item skipped unless image_radio_c0="1" OR image_mr_c0="1" OR image_ct_c0="1"
	Primary indications: Painful structural deformity	1, Yes	imageind_deform_c0	Item skipped unless image_radio_c0="1" OR image_mr_c0="1" OR image_ct_c0="1"
	Primary indications: Symptoms of listhesis / stenosis	1, Yes	imageind_list_c0	Item skipped unless image_radio_c0="1" OR image_mr_c0="1" OR image_ct_c0="1"
	Primary indications: None of the above mentioned	1, Yes	imageind_none_c0	Item skipped unless image_radio_c0="1" OR image_mr_c0="1" OR image_ct_c0="1"
	Secondary indications: Desire or pressure from the patient or relatives	1, Yes	imagespec_press_c0	Item skipped unless image_radio_c0="1" OR image_mr_c0="1" OR image_ct_c0="1"
	Secondary indications: Pedagogical reasons	1, Yes	imagespec_paed_c0	Item skipped unless image_radio_c0="1" OR image_mr_c0="1" OR image_ct_c0="1"
	Secondary indications: Desire from the insurance company	1, Yes	imagespec_insurance_c0	Item skipped unless image_radio_c0="1" OR image_mr_c0="1" OR image_ct_c0="1"
	Secondary indications: Just for the sake of safety	1, Yes	imagespec_safety_c0	Item skipped unless image_radio_c0="1" OR image_mr_c0="1" OR image_ct_c0="1"
	Secondary indications: For the sake of treatment strategy	1, Yes	imagespec_strat_c0	Item skipped unless image_radio_c0="1" OR image_mr_c0="1" OR image_ct_c0="1"
	Secondary indications: None of the above mentioned	1, Yes	imagespec_none_c0	Item skipped unless image_radio_c0="1" OR image_mr_c0="1" OR image_ct_c0="1"
Treatment and plan	What treatment did you plan for this patient: Maintain normal physical activity rather than respite care	1, Yes	treat_normal_c0
	What treatment did you plan for this patient: Manipulation	1, Yes	treat_mani_c0
	What treatment did you plan for this patient: Mobilisation (MET, stretching)	1, Yes	treat_mob_c0
	What treatment did you plan for this patient: Flexion/distraction	1, Yes	treat_flex_c0
	What treatment did you plan for this patient: Soft tissLE treatment (trigger point, massage etc.)	1, Yes	treat_softissLE_c0
	What treatment did you plan for this patient: Dry-needling	1, Yes	treat_dryneedle_c0
	What treatment did you plan for this patient: Acupuncture	1, Yes	treat_aku_c0
	What treatment did you plan for this patient: Exercise at home (not supervised)	1, Yes	treat_homeexer_c0
	What treatment did you plan for this patient: Physical exercise (Supervised)	1, Yes	treat_physexer_c0
	What treatment did you plan for this patient: Direction specific exercise (e.g. MzKenzie)	1, Yes	treat_direxer_c0
	What treatment did you plan for this patient: Exercise of neuromuscular control	1, Yes	treat_neuroexer_c0
	What treatment did you plan for this patient: Strength training / cardio	1, Yes	treat_strengtexer_c0
	What treatment did you plan for this patient: Laser	1, Yes	treat_laser_c0
	What treatment did you plan for this patient: taping	1, Yes	treat_taping_c0
	What treatment did you plan for this patient: Heat or cold therapy	1, Yes	treat_coldheat_c0
	What treatment did you plan for this patient: Ergonomic advice	1, Yes	treat_ergo_c0
	What treatment did you plan for this patient: Dietary supplement	1, Yes	treat_diet_c0
	What treatment did you plan for this patient: Advice on weight loss	1, Yes	treat_weight_c0
	What treatment did you plan for this patient: Advice on non-prescriptive pain medication	1, Yes	treat_piankill_c0
	What treatment did you plan for this patient: respite care	1, Yes	treat_relief_c0
Comments	Comments	Text field	comm_c0
